# Supplementary material for: Application of Multivariate Statistical Techniques and Water Quality Index for the Assessment of Water Quality and Apportionment of Pollution Sources in the Yeongsan River, South Korea
Source: MDPI journal article supplement (doi:10.3390/ijerph18168268), 2021-08-04
Supplement: s1 [file s1]

## Supplementary File

### Application of Multivariate Statistical Techniques and Water Quality Index for the Assessment of Water Quality and Apportionment of Pollution Sources in the Yeongsan River, South Korea

Md Mamun and Kwang-Guk An

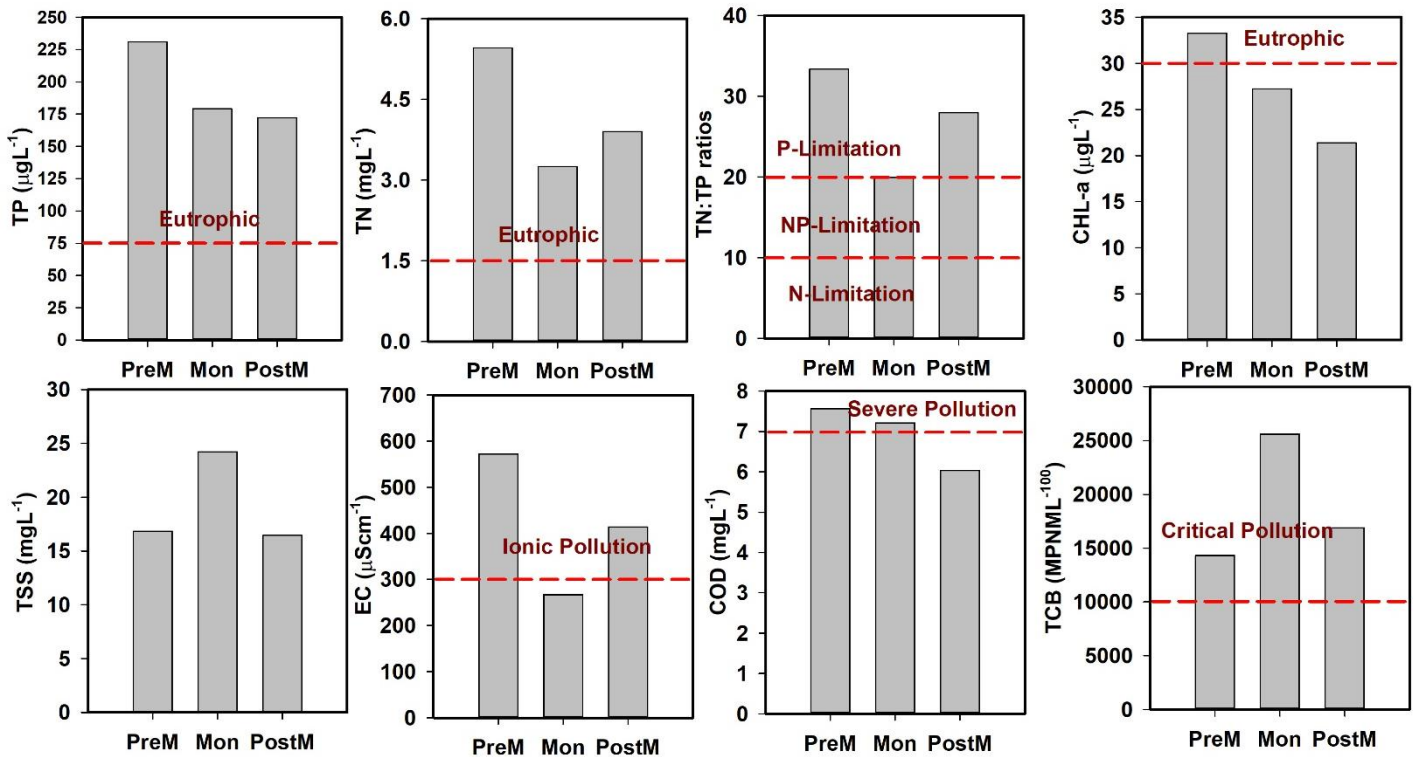

Figure S1. Seasonal impacts on nutrients (TP: total phosphorus, TN: total nitrogen), nutrient ratios (TN:TP ratios), algal chlorophyll (CHL-a: chlorophyll-a), suspended solids (TSS: total suspended solids), ionic concentrations (EC: electrical conductivity), organic matter (COD: chemical oxygen demand) and total coliform bacteria (TCB) in the Yeongsan River (PreM; premonsoon: January-June, Mon; monsoon: July-August, and PostM: postmonsoon: September-December)

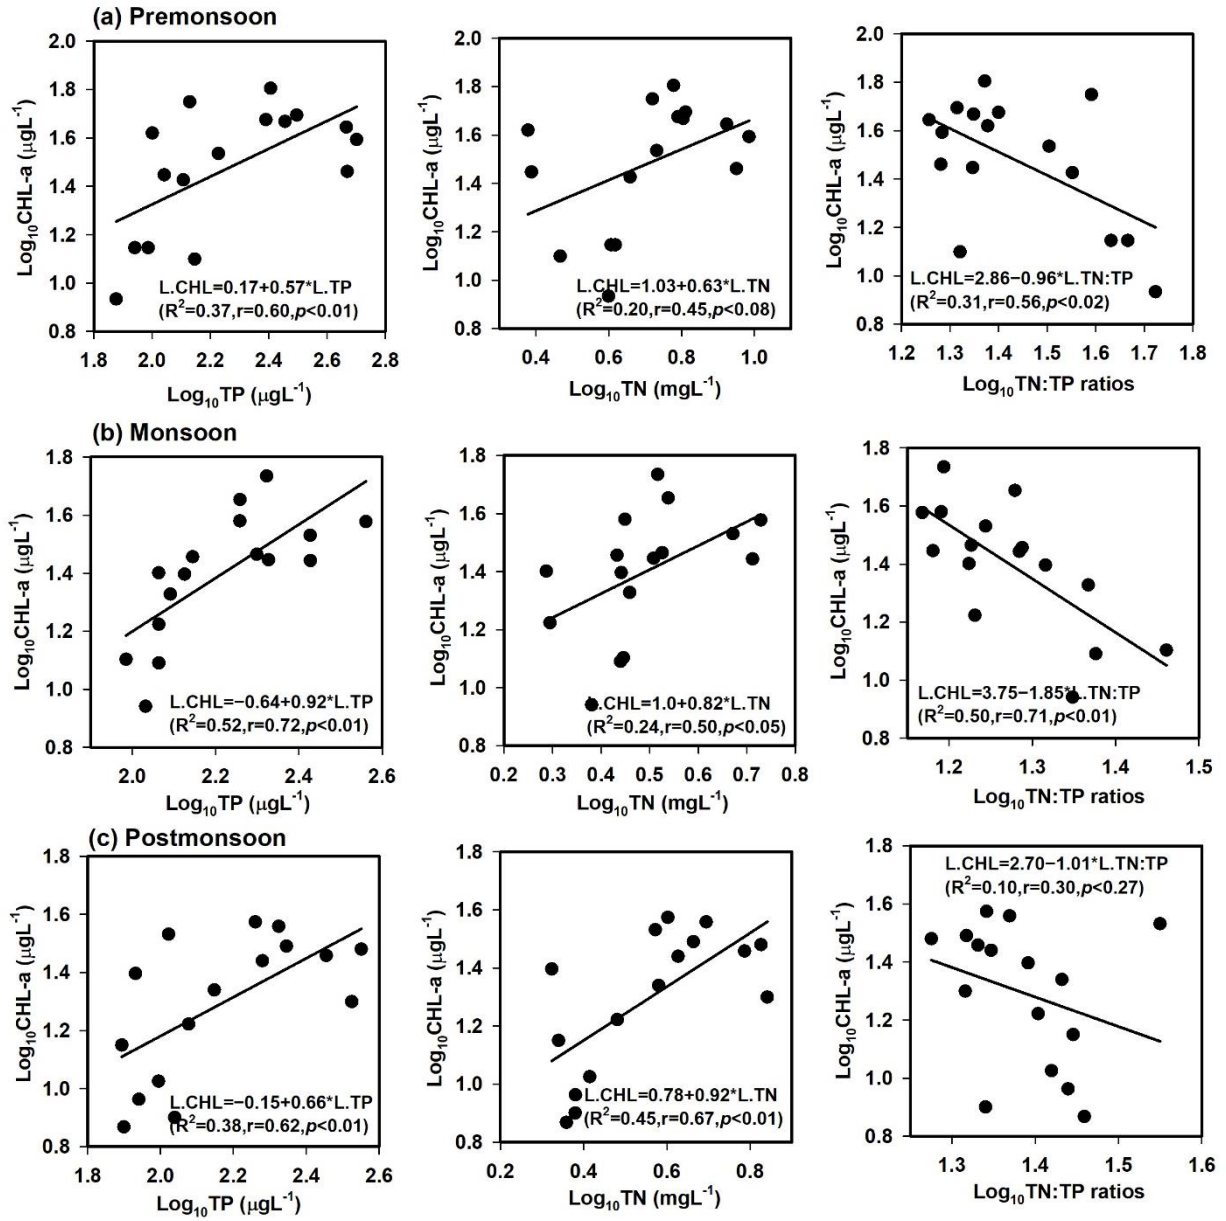

Figure S2. Regression analysis of log-transformed algal chlorophyll (CHL-a: chlorophyll-a) with TP (total phosphorus), TN (total nitrogen), TN:TP ratios during premonsoon (January-June), monsoon (July-August) and postmonsoon (September-December) season in the Yeongsan River

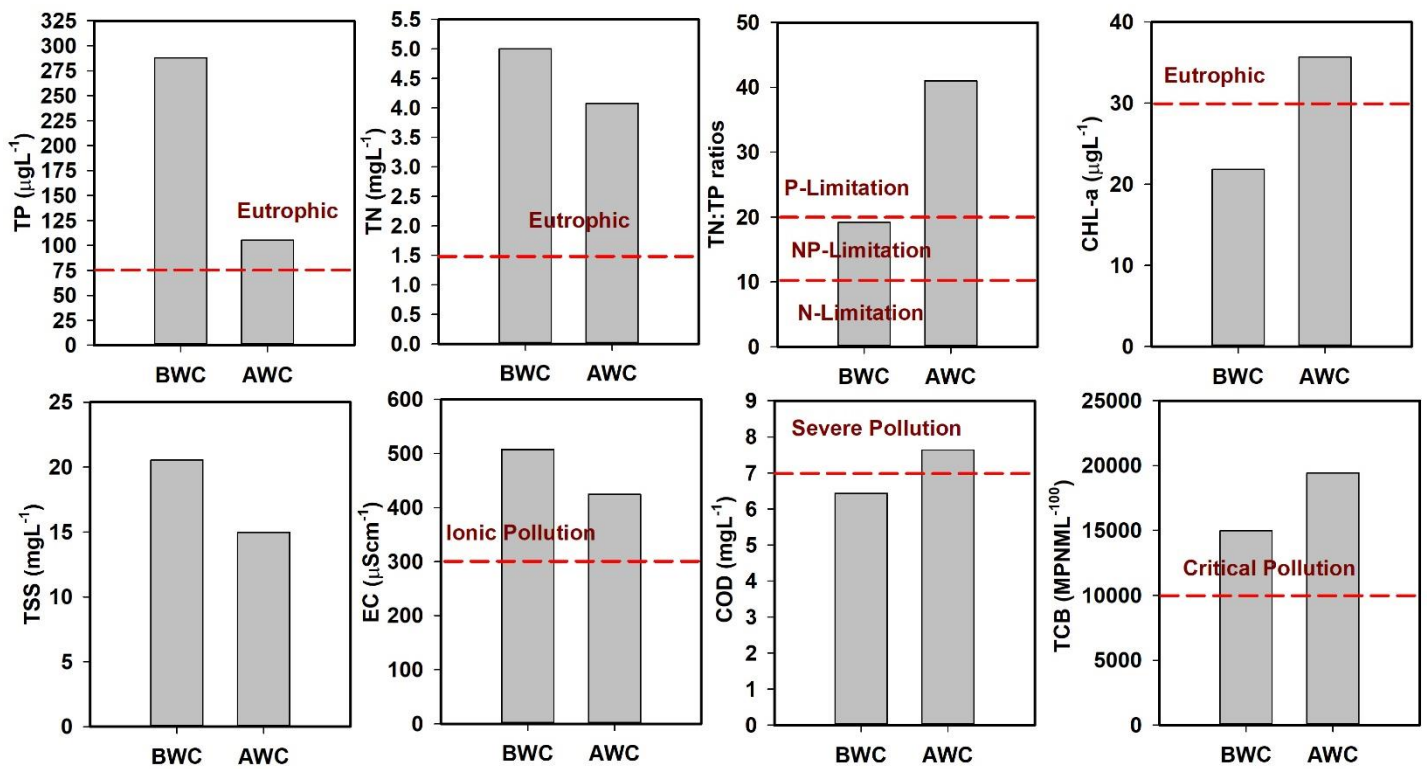

Figure S3. Changes in nutrients (TP: total phosphorus, TN: total nitrogen), nutrient ratios (TN:TP ratios), algal chlorophyll (CHL-a: chlorophyll-a), suspended solids (TSS: total suspended solids), ionic concentrations (EC: electrical conductivity), organic matter (COD: chemical oxygen demand) and total coliform bacteria (TCB) in the Yeongsan River in the periods of before and after weir construction (BWC: before weir construction and AWC: after weir construction)

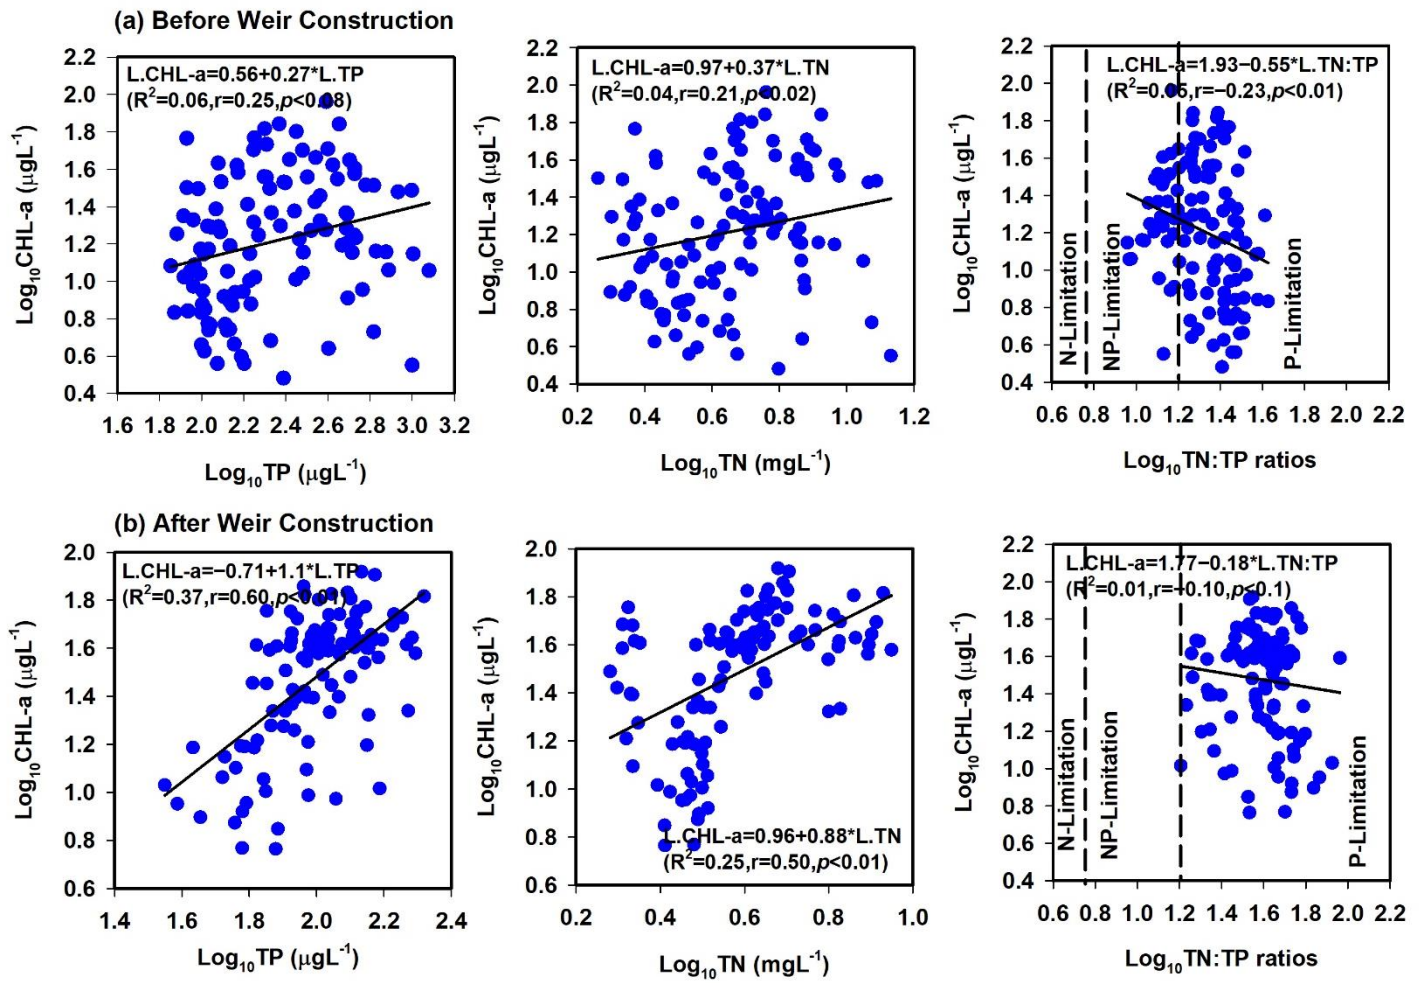

Figure S4. Regression analysis of log-transformed algal chlorophyll (CHL-a: chlorophyll-a) with TP (total phosphorus), TN (total nitrogen), TN:TP ratios in the Yeongsan River in the periods of before and after weir construction

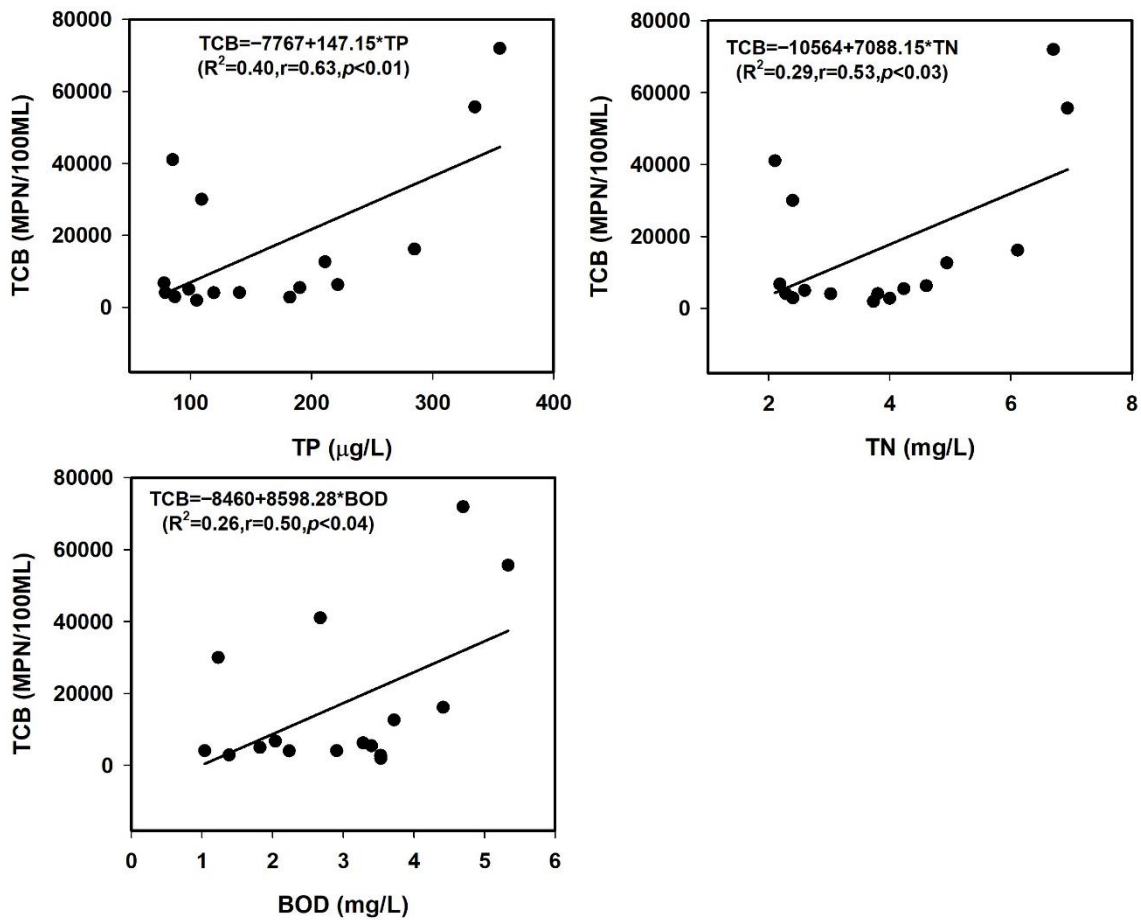

Figure S5. Regression analysis of TCB (total coliform bacteria) with TP (total phosphorus), TN (total nitrogen), and BOD (biological oxygen demand)

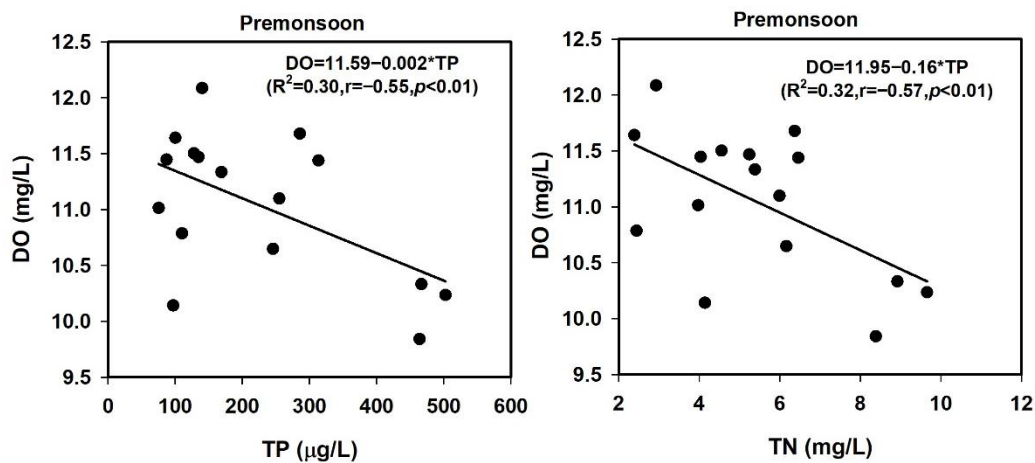

Figure S6. Regression analysis of DO (dissolved oxygen) with TP (total phosphorus) and TN (total nitrogen)

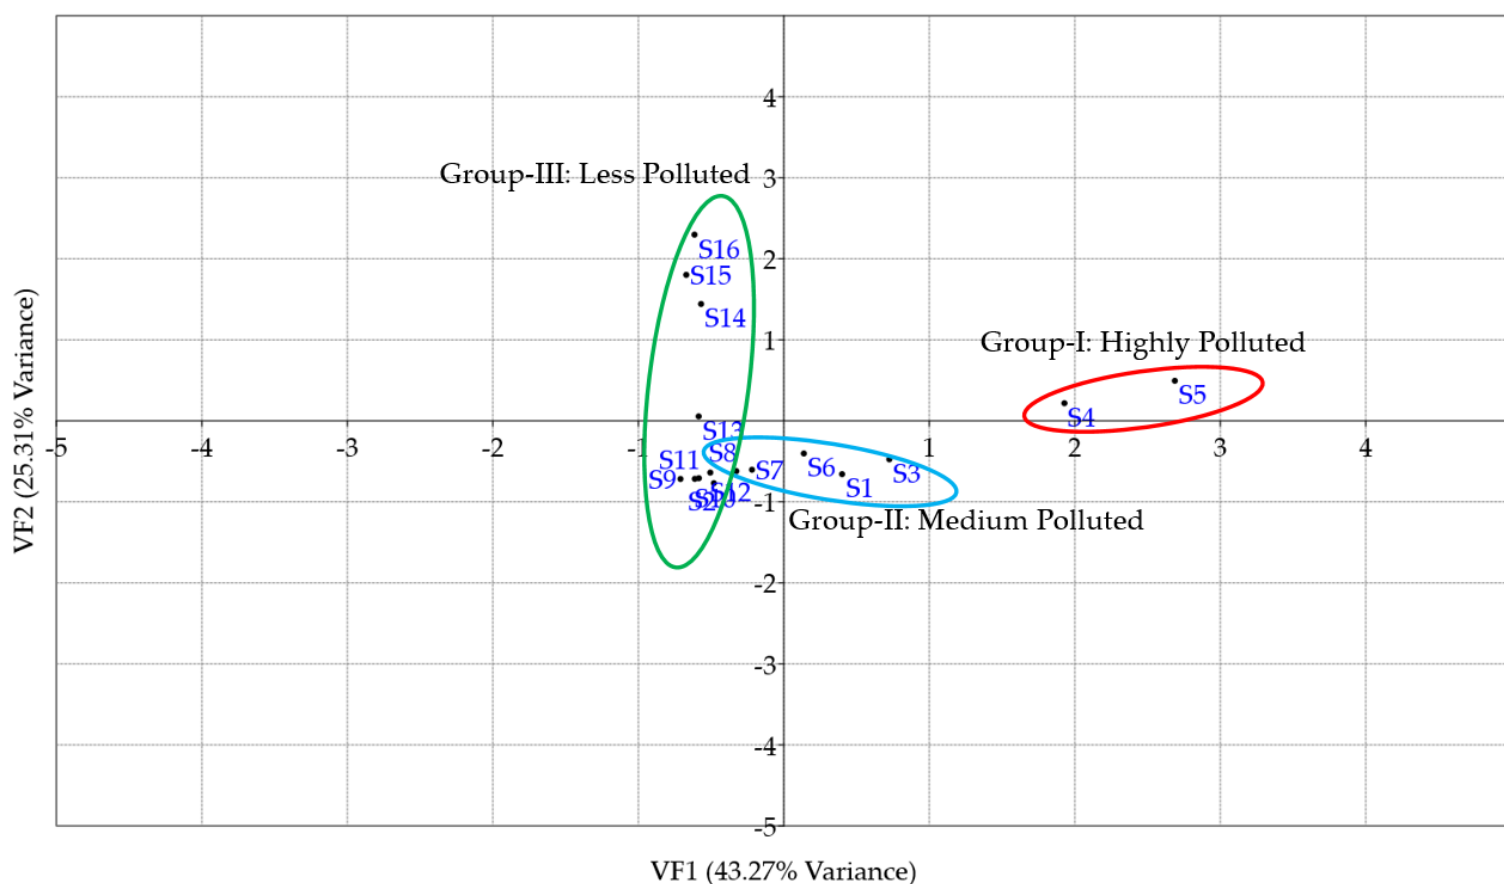

Figure S7. Scatter plot of the eigenvalue scores for the sites of Yeongsan River based on PCA/FA.

Table S1. WQI range, status, and possible usage of the water sample (Brown et al.1972)

| Water quality index (WQI) | Water quality status (WQS)               | Possible usage                       |
|---------------------------|------------------------------------------|--------------------------------------|
| 0-25                      | Excellent                                | Drinking, irrigation and industrial  |
| 26-50                     | Good                                     | Drinking, irrigation and industrial  |
| 51-75                     | Poor                                     | Irrigation and industrial            |
| 76-100                    | Very poor                                | Irrigation                           |
| Above 100                 | Unsuitable for drinking and fish culture | Proper treatment required before use |

Table S2. The concentration of PO<sub>4</sub>-P, TDP, and NO<sub>3</sub>-N at 16 sites in Yeongsan River.

| Sites | PO <sub>4</sub> -P(mg/L) | TDP (mg/L) | NO <sub>3</sub> -N(mg/L) |
|-------|--------------------------|------------|--------------------------|
| S1    | 0.08                     | 0.10       | 1.87                     |
| S2    | 0.04                     | 0.06       | 1.43                     |
| S3    | 0.03                     | 0.05       | 1.19                     |
| S4    | 0.25                     | 0.31       | 3.10                     |
| S5    | 0.27                     | 0.35       | 3.00                     |
| S6    | 0.22                     | 0.27       | 3.01                     |
| S7    | 0.16                     | 0.19       | 2.75                     |
| S8    | 0.14                     | 0.18       | 2.79                     |
| S9    | 0.05                     | 0.07       | 2.16                     |
| S10   | 0.12                     | 0.14       | 2.59                     |
| S11   | 0.11                     | 0.14       | 2.72                     |
| S12   | 0.08                     | 0.11       | 2.54                     |
| S13   | 0.06                     | 0.08       | 2.23                     |
| S14   | 0.05                     | 0.07       | 2.14                     |
| S15   | 0.04                     | 0.06       | 2.11                     |
| S16   | 0.04                     | 0.06       | 2.10                     |

Table S3. Mann-Kendall trend test results for water quality variables at 16 monitoring sites and overall river network (WT: water temperature, EC: electrical conductivity, TP: total phosphorus, TN: total nitrogen, TSS: total suspended solids, BOD: biological oxygen demand, COD: chemical oxygen demand, CHL-a: chlorophyll-a, TCB: total coliform bacteria).

| Water Quality Variables | WT | EC | TP | TN | TSS | BOD | COD | CHL-a | TCB |
|-------------------------|----|----|----|----|-----|-----|-----|-------|-----|
| S1                      | ↑  | ↔  | ↔  | ↔  | ↔   | ↔   | ↑   | ↔     | ↔   |
| S2                      | ↔  | ↑  | ↔  | ↓  | ↔   | ↔   | ↔   | ↔     | ↔   |
| S3                      | ↔  | ↔  | ↔  | ↔  | ↔   | ↔   | ↑   | ↔     | ↔   |
| S4                      | ↑  | ↔  | ↓  | ↔  | ↓   | ↓   | ↑   | ↑     | ↑   |
| S5                      | ↑  | ↔  | ↓  | ↔  | ↔   | ↔   | ↑   | ↑     | ↑   |
| S6                      | ↔  | ↔  | ↓  | ↓  | ↓   | ↓   | ↑   | ↑     | ↔   |
| S7                      | ↔  | ↔  | ↓  | ↓  | ↔   | ↔   | ↑   | ↑     | ↔   |
| S8                      | ↔  | ↔  | ↓  | ↓  | ↔   | ↔   | ↑   | ↑     | ↓   |
| S9                      | ↔  | ↔  | ↔  | ↔  | ↔   | ↔   | ↔   | ↔     | ↑   |
| S10                     | ↔  | ↔  | ↓  | ↓  | ↓   | ↓   | ↔   | ↔     | ↔   |
| S11                     | ↔  | ↔  | ↓  | ↓  | ↓   | ↔   | ↑   | ↔     | ↔   |
| S12                     | ↔  | ↔  | ↓  | ↓  | ↔   | ↓   | ↑   | ↑     | ↔   |
| S13                     | ↔  | ↓  | ↓  | ↓  | ↔   | ↔   | ↑   | ↑     | ↔   |
| S14                     | ↔  | ↔  | ↓  | ↓  | ↔   | ↔   | ↑   | ↑     | ↓   |
| S15                     | ↔  | ↔  | ↓  | ↓  | ↔   | ↔   | ↑   | ↔     | ↔   |
| S16                     | ↔  | ↔  | ↓  | ↓  | ↔   | ↔   | ↑   | ↑     | ↓   |
| Overall River           | ↔  | ↔  | ↓  | ↓  | ↔   | ↓   | ↑   | ↑     | ↔   |

↑: increasing trend, ↓: decreasing trend, ↔: no trend



Table S4. Classification functions for discriminant analysis of spatial variations in water quality of the Yeongsan River. pH- hydrogen ion concentration, WT: water temperature, DO: dissolved oxygen, EC: electrical conductivity, TSS: total suspended solids, TP: total phosphorus, TN: total nitrogen, BOD: biological oxygen demand, COD: chemical oxygen demand, CHL-a: chlorophyll-a, TCB: total coliform bacteria, HP: highly polluted, MP: medium polluted, LP: less polluted) (Fisher's linear discriminant functions).

| Variables  | Standard mode |         |         | Stepwise mode |         |         |
|------------|---------------|---------|---------|---------------|---------|---------|
|            | Sites         |         |         | Sites         |         |         |
|            | HP            | MP      | LP      | HP            | MP      | LP      |
| pH         | 77.30         | 82.91   | 85.37   | 100.16        | 104.77  | 107.11  |
| WT         | 25.95         | 25.04   | 24.64   |               |         |         |
| DO         | 6.29          | 5.89    | 4.78    | 6.10          | 5.74    | 4.44    |
| EC         | 0.01          | 0.008   | 0.01    |               |         |         |
| TSS        | 0.26          | 0.29    | 0.32    |               |         |         |
| TP         | 0.02          | 0.03    | 0.03    |               |         |         |
| TN         | 3.25          | 2.18    | 2.27    | 10.45         | 9.36    | 9.36    |
| BOD        | -6.71         | -8.13   | -9.13   | -8.42         | -8.97   | -10.16  |
| COD        | 6.44          | 5.83    | 6.54    | 9.16          | 8.21    | 9.04    |
| CHL-a      | -0.77         | -0.64   | -0.65   | -0.65         | -0.53   | -0.55   |
| TCB        | -0.0001       | -0.0002 | -0.0003 | -0.0001       | -0.0002 | -0.0003 |
| (Constant) | -559.95       | -565.84 | -568.65 | -445.18       | -458.07 | -463.57 |

Table S5. Classification matrix for discriminant analysis of spatial variations in water quality of the Yeongsan River. HP: highly polluted, MP: medium polluted, LP: less polluted.

| Sites         | % correct | Sites assigned by DA |    |     |
|---------------|-----------|----------------------|----|-----|
| Standard mode |           | HP                   | MP | LP  |
| HP            | 96.4      | 27                   | 7  | 0   |
| MP            | 80.0      | 1                    | 60 | 28  |
| LP            | 77.8      | 0                    | 8  | 98  |
| Total         | 80.8      | 28                   | 75 | 126 |
| Stepwise mode |           |                      |    |     |
| HP            | 96.4      | 27                   | 8  | 0   |
| MP            | 77.3      | 0                    | 58 | 23  |
| LP            | 81.7      | 1                    | 9  | 103 |

|       |      |    |    |     |
|-------|------|----|----|-----|
| Total | 82.1 | 28 | 75 | 126 |
|-------|------|----|----|-----|

Table S6. Classification functions for discriminant analysis of temporal variations in water quality of the Yeongsan River. pH: hydrogen ion concentration, WT: water temperature, DO: dissolved oxygen, EC: electrical conductivity, TSS: total suspended solids, TP: total phosphorus, TN: total nitrogen, BOD: biological oxygen demand, COD: chemical oxygen demand, CHL-a: chlorophyll-a, TCB: total coliform bacteria, Premonsoon: January-June, Monsoon: July-August, Postmonsoon: September-December. (Fisher's linear discriminant functions).

| Variables  | Standard mode |          |             | Stepwise mode |         |             |
|------------|---------------|----------|-------------|---------------|---------|-------------|
|            | Season        |          |             | Season        |         |             |
|            | Premonsoon    | Monsoon  | Postmonsoon | Premonsoon    | Monsoon | Postmonsoon |
| pH         | 265.10        | 257.83   | 260.35      | 177.67        | 170.39  | 173.56      |
| WT         | 0.59          | 1.24     | 0.61        | -1.37         | -0.64   | -1.28       |
| DO         | 2.50          | 3.94     | 2.12        | -6.39         | -4.91   | -6.52       |
| EC         | -0.02         | -0.02    | -0.02       | 0.01          | 0.01    | 0.008       |
| TSS        | -1.61         | -1.39    | -1.53       | -1.538        | -1.336  | -1.466      |
| TP         | 0.31          | 0.32     | .31         |               |         |             |
| TN         | 5.45          | 5.20     | 5.26        |               |         |             |
| BOD        | -21.19        | -23.82   | -22.16      |               |         |             |
| COD        | 28.19         | 28.48    | 27.03       | 8.10          | 6.94    | 6.81        |
| CHL-a      | -2.49         | -2.44    | -2.42       |               |         |             |
| TCB        | -0.0001       | -0.0001  | -0.0001     |               |         |             |
| (Constant) | -1098.23      | -1068.23 | -1049.05    | -670.70       | -638.20 | -630.01     |

Table S7. Classification matrix for discriminant analysis of temporal variations in water quality of the Yeongsan River. Premonsoon: January-June, Monsoon: July-August, Postmonsoon: September-December.

| Sites         | % correct | Season assigned by DA |         |             |
|---------------|-----------|-----------------------|---------|-------------|
| Standard mode |           | Premonsoon            | Monsoon | Postmonsoon |
| Premonsoon    | 85.4      | 82                    | 0       | 9           |
| Monsoon       | 93.8      | 3                     | 30      | 11          |
| Postmonsoon   | 68.8      | 11                    | 2       | 44          |
| Total         | 81.3      | 96                    | 32      | 64          |
| Stepwise mode |           |                       |         |             |

|             |      |    |    |    |
|-------------|------|----|----|----|
| Premonsoon  | 84.4 | 81 | 0  | 13 |
| Monsoon     | 96.9 | 4  | 31 | 11 |
| Postmonsoon | 62.5 | 11 | 1  | 40 |
| Total       | 80.0 | 96 | 32 | 64 |
